# Supplementary material
Source: PubMed Central journal article supplement (PMC6994259)

**Supplementary Figure 1**

Uncropped scan with size marker indication (cf. Extended Data Figure 1a).

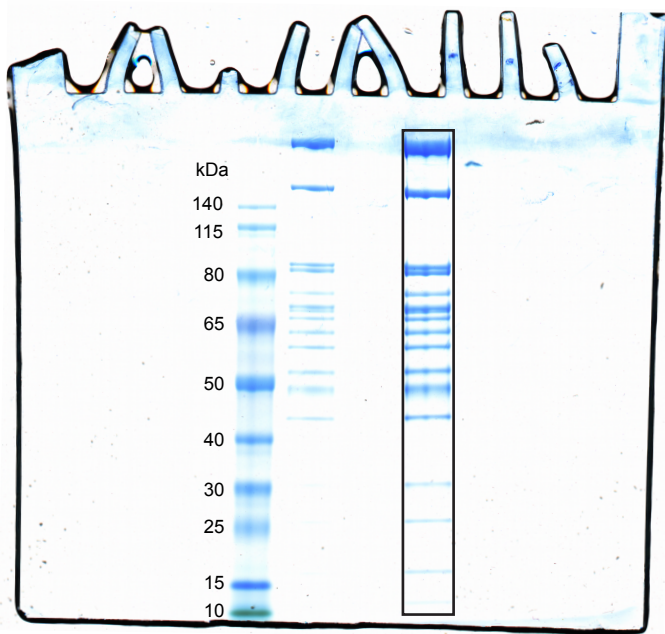

Supplement: EMS85072-supplement-Supplementary_figure_1.pdf [file EMS85072-supplement-Supplementary_figure_1.pdf]
